# Supplementary material for: Identification of T-Cell Epitopes Using a Combined In-Silico and Experimental Approach in a Mouse Model for SARS-CoV-2
Source: MDPI journal article supplement (doi:10.3390/cimb45100502), 2023-09-28
Supplement: s1 [file s1]

## Supplementary

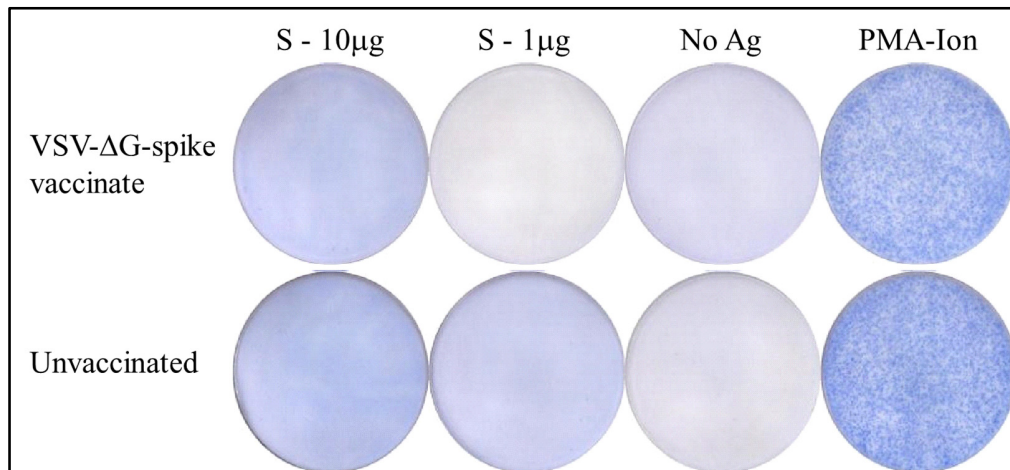

**Supplementary Figure S1.** ELISpot assay using stabilized S. C57BL/6 mice were vaccinated with VSVΔG-spike by i.m. injection. After seven days, a  $\gamma$ -based ELISpot assay was performed on isolated splenocytes using stabilized S as antigen for stimulation.

|                |             |    |    |    |    |    |     |    |    |    |    |    |
|----------------|-------------|----|----|----|----|----|-----|----|----|----|----|----|
| <b>plate 1</b> |             |    |    |    |    |    |     |    |    |    |    |    |
|                | Spot Counts |    |    |    |    |    |     |    |    |    |    |    |
|                | 1           | 2  | 3  | 4  | 5  | 6  | 7   | 8  | 9  | 10 | 11 | 12 |
| A              | 19          | 12 | 11 | 22 | 10 | 21 | 11  | 19 | 16 | 59 | 18 | 21 |
| B              | 10          | 10 | 14 | 14 | 18 | 8  | 9   | 13 | 9  | 68 | 15 | 24 |
| C              | 19          | 12 | 19 | 10 | 3  | 11 | 9   | 5  | 18 | 9  | 13 | 19 |
| D              | 29          | 15 | 10 | 6  | 8  | 10 | 7   | 10 | 4  | 13 | 29 | 13 |
| E              | 16          | 13 | 8  | 10 | 7  | 8  | 4   | 1  | 9  | 24 | 15 | 11 |
| F              | 11          | 24 | 26 | 17 | 20 | 7  | 6   | 18 | 2  | 9  | 15 | 9  |
| G              | 8           | 38 | 15 | 24 | 9  | 16 | 17  | 15 | 8  | 9  | 14 | 13 |
| H              | 10          | 9  | 26 | 22 | 8  | 11 | 13  | 16 | 8  | 14 | 22 | 6  |
| <b>Plate 2</b> |             |    |    |    |    |    |     |    |    |    |    |    |
|                | Spot Counts |    |    |    |    |    |     |    |    |    |    |    |
|                | 1           | 2  | 3  | 4  | 5  | 6  | 7   | 8  | 9  | 10 | 11 | 12 |
| A              | 9           | 11 | 18 | 13 | 6  | 8  | 3   | 5  | 1  | 13 | 10 | 10 |
| B              | 12          | 4  | 4  | 5  | 2  | 5  | 7   | 16 | 4  | 2  | 9  | 7  |
| C              | 4           | 3  | 8  | 7  | 11 | 4  | 9   | 5  | 7  | 6  | 4  | 6  |
| D              | 4           | 1  | 1  | 3  | 8  | 5  | 7   | 6  | 6  | 5  | 6  | 4  |
| E              | 6           | 10 | 7  | 5  | 1  | 2  | 3   | 7  | 5  | 12 | 5  | 4  |
| F              | 13          | 9  | 5  | 12 | 5  | 7  | 230 | 8  | 9  | 5  | 5  | 8  |
| G              | 3           | 16 | 10 | 7  | 4  | 14 | 125 | 8  | 5  | 2  | 9  | 2  |
| H              | 2           | 4  | 10 | 6  | 4  | 4  | 8   | 7  | 13 | 4  | 4  | 5  |
| <b>Plate 3</b> |             |    |    |    |    |    |     |    |    |    |    |    |
|                | Spot Counts |    |    |    |    |    |     |    |    |    |    |    |
|                | 1           | 2  | 3  | 4  | 5  | 6  | 7   | 8  | 9  | 10 | 11 | 12 |
| A              | 6           | 11 | 7  | 12 | 10 | 12 | 4   | 15 | 5  | 7  | 7  | 10 |
| B              | 11          | 24 | 6  | 9  | 5  | 8  | 1   | 10 | 18 | 4  | 5  | 14 |
| C              | 8           | 6  | 10 | 8  | 2  | 4  | 5   | 7  | 8  | 12 | 13 | 6  |
| D              | 10          | 11 | 8  | 11 | 7  | 2  | 10  | 7  | 3  | 4  | 13 | 12 |
| E              | 11          | 7  | 5  | 7  | 5  | 6  | 5   | 4  | 3  | 4  | 5  | 5  |
| F              | 4           | 9  | 14 | 2  | 9  | 4  | 7   | 7  | 4  | 6  | 5  | 10 |
| G              | 10          | 11 | 16 | 8  | 12 | 24 | 12  | 14 | 12 | 8  | 3  | 13 |
| H              | 5           | 4  | 3  | 8  | 10 | 18 | 17  | 9  | 6  | 8  | 10 | 3  |
| <b>Plate 4</b> |             |    |    |    |    |    |     |    |    |    |    |    |
|                | Spot Counts |    |    |    |    |    |     |    |    |    |    |    |
|                | 1           | 2  | 3  | 4  | 5  | 6  | 7   | 8  |    |    |    |    |
| A              | 7           | 3  | 4  | 2  | 2  | 3  | 7   | 7  |    |    |    |    |
| B              | 2           | 6  | 4  | 5  | 2  | 1  | 3   | 2  |    |    |    |    |
| C              | 5           | 7  | 8  | 0  | 10 | 3  | 3   | 2  |    |    |    |    |
| D              | 0           | 5  | 4  | 5  | 12 | 8  | 4   | 2  |    |    |    |    |
| E              | 3           | 8  | 7  | 6  | 2  | 2  | 8   | 4  |    |    |    |    |
| F              | 3           | 6  | 7  | 5  | 1  | 10 | 4   | 4  |    |    |    |    |
| G              | 4           | 4  | 3  | 4  | 3  | 3  | 2   | 1  |    |    |    |    |
| H              | 4           | 2  | 0  | 8  | 3  | 2  | 2   | 4  |    |    |    |    |

**Supplementary Figure S2.** Epitope scanning using SARS-CoV-2 Spike overlapping peptide library. C57BL/6 mice were vaccinated i.m. with VSVΔG-Spike ( $10^7$  pfu). After seven days, splenocytes from vaccinated animals were utilized for IFN $\gamma$  ELISpot assay using the peptide library as antigens for stimulation. Column 1 of each plate contains negative unstimulated control wells. Highlighted in yellow are wells with a substantial response.
